# Supplementary material for: Simultaneous enhancement of coercivity and saturation magnetization in high-performance anisotropic NdFeB thick films with a Dy diffusion layer
Source: Royal Society of Chemistry journal article supplement (doi:10.1039/d3nr03677d), 2023-01-01
Supplement: d3nr03677d1.pdf [file d3nr03677d1.pdf]

## Simultaneous enhancement of coercivity and saturation magnetization in high-performance anisotropic NdFeB thick film with Dy diffusion layer

Zhixing Ye, Xiaotian Zhao\*, Wei Liu\*, Long Liu, Jinghui Wang, JinXiang Wu, Yang Li, Jun Ma, Hongzhan Ju, Zhidong Zhang

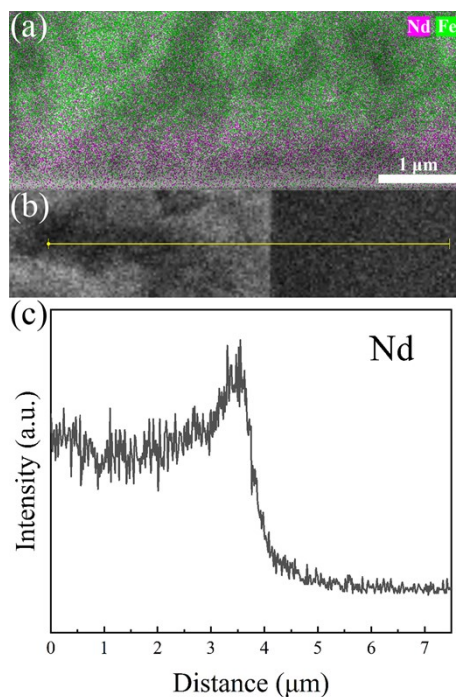

Figure S1 (a) EDX mapping result taken from the region of the Ta (100 nm)/{NdFeB (1 μm)/[Nd (5 nm)/Dy (5 nm)]<sub>5</sub>/NdFeB (1 μm)/Ta (100 nm)}. (b) and (c) The corresponding enlarged image and EDX line scan results for Nd elements

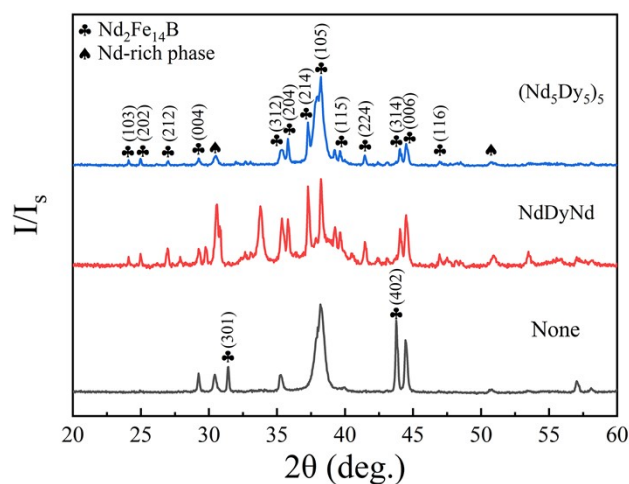

Figure S2. XRD patterns of Ta (100 nm)/NdFeB (2  $\mu\text{m}$ ) /Ta (100 nm), Ta (100 nm)/NdFeB (1  $\mu\text{m}$ )/Nd (12.5 nm)/Dy (25 nm)/Nd (12.5 nm)/NdFeB (1  $\mu\text{m}$ ) /Ta (100 nm) and Ta (100 nm)/NdFeB (1  $\mu\text{m}$ )/[Nd (5 nm)/Dy (5 nm)]<sub>5</sub>/NdFeB (1  $\mu\text{m}$ ) /Ta (100 nm).

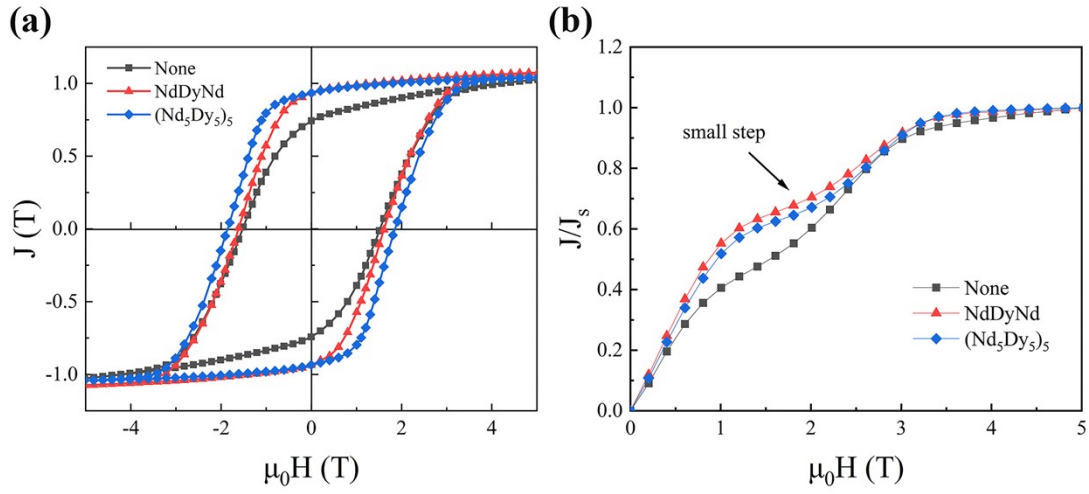

Figure S3. a) and b) Room temperature out-of-plane magnetic hysteresis loops and initial magnetization curves of Ta (100 nm)/NdFeB (2  $\mu\text{m}$ ) /Ta (100 nm), Ta (100 nm)/NdFeB (1  $\mu\text{m}$ )/Nd (12.5 nm)/Dy (25 nm)/Nd (12.5 nm)/NdFeB (1  $\mu\text{m}$ ) /Ta (100 nm) and Ta (100 nm)/NdFeB (1  $\mu\text{m}$ )/[Nd (5 nm)/Dy (5 nm)]<sub>5</sub>/NdFeB (1  $\mu\text{m}$ ) /Ta (100 nm).

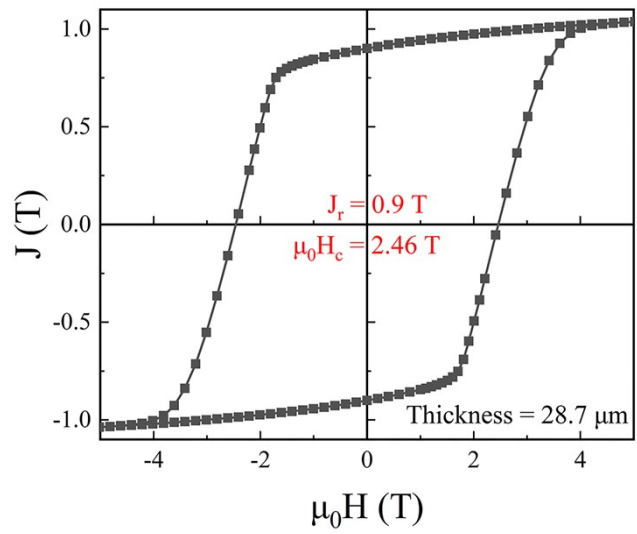

Figure S4. Room temperature out-of-plane magnetic hysteresis loops of Ta (100 nm)/NdFeB (28.7  $\mu\text{m}$ ).

nm)/[NdFeB (1  $\mu\text{m}$ )/ Dy 50 nm]<sub>28</sub>/NdFeB (1  $\mu\text{m}$ )/Ta (100 nm).
